# Supplementary material for: Behavior of QQ-Plots and Genomic Control in Studies of Gene-Environment Interaction
Source: PubMed Central journal article supplement (PMC3093379; doi:10.1371/journal.pone.0019416), 2011-05-12
Supplement: pone.0019416.s001.pdf [file pone.0019416.s001.pdf]

## Appendix S1

For the case of simple linear regression, we can show directly that  $\mathbb{E}[\hat{\beta}_{G \times E} | Y, E] \approx 0$  with high probability (ie, for virtually all realizations of  $Y$  and  $E$ ). Suppose we work with centered variables:  $E - \bar{E}$ ,  $G - \bar{G}$ , and  $(G - \bar{G})(E - \bar{E})$ . Let  $X$  be the design matrix with columns  $(1, E - \bar{E}, G - \bar{G}, \text{ and } (G - \bar{G})(E - \bar{E}))$  and write

$$\hat{\beta} = (X^T X)^{-1} (X^T Y).$$

Consider the interaction component of  $X^T Y$ , which is  $\sum_{i=1}^n (G_i - \bar{G})(E_i - \bar{E})Y_i$ . This is linear in  $G$ , so its conditional expectation given  $E$  and  $Y$  is just

$$\sum_{i=1}^N \mathbb{E}[G_i - \bar{G} | E, Y] (E_i - \bar{E}) Y_i = \sum_{i=1}^N 0 \times (E_i - \bar{E}) Y_i = 0.$$

The same is true of the genetic main-effect component, which is  $\sum_{i=1}^n (G_i - \bar{G})Y_i$  and has expectation

$$\sum_{i=1}^N \mathbb{E}[G_i - \bar{G} | E, Y] Y_i = \sum_{i=1}^N 0 \times Y_i = 0.$$

By a similar argument,  $\mathbb{E}[X^T X | Y, E]$  has the diagonal form

$$\mathbb{E}[X^T X] = \begin{bmatrix} n & 0 & 0 & 0 \\ 0 & \sum (E_i - \bar{E})^2 & 0 & 0 \\ 0 & 0 & (n-1)\text{var}[G] & 0 \\ 0 & 0 & 0 & \frac{n-1}{n}\text{var}[G] \sum (E_i - \bar{E})^2 \end{bmatrix}$$

where the first row and column are zero due to centering and the remaining off-diagonal terms are zero due to independence of  $G$  and  $E$ . Thus  $\mathbb{E}[X^T X]^{-1}$  is also diagonal. This means that the  $G$  and  $G \times E$  entries of

$\mathbb{E}[X^T X|Y, E]^{-1}\mathbb{E}[X^T Y|Y, E]$  are zero. Omitting SNPs where  $X^T X$  is singular (eg, those that are monomorphic in the sample),

$$\begin{aligned}\hat{\beta} &= \mathbb{E}[(X^T X)^{-1}X^T Y|Y, E] \\ &= \mathbb{E}[X^T X|Y, E]^{-1}\mathbb{E}[X^T Y|Y, E] + O_p(1/n) \\ &= O_p(1/n)\end{aligned}$$

so  $\mathbb{E}[\hat{\beta}_{G \times E}|Y, E] = O_p(1/n)$  and  $\text{Var} \left[ \mathbb{E}[\hat{\beta}_{G \times E}|Y, E] \right] = O(1/n^2)$ .

The second term in equation (3) is  $O(1/n)$ , so the first term is of smaller order and can be ignored when sample size is large. A model-robust variance estimator will give  $\hat{\lambda} \approx 1$  in the absence of population substructure.
